# Supplementary material
Source: PubMed Central journal article supplement (PMC4268883)

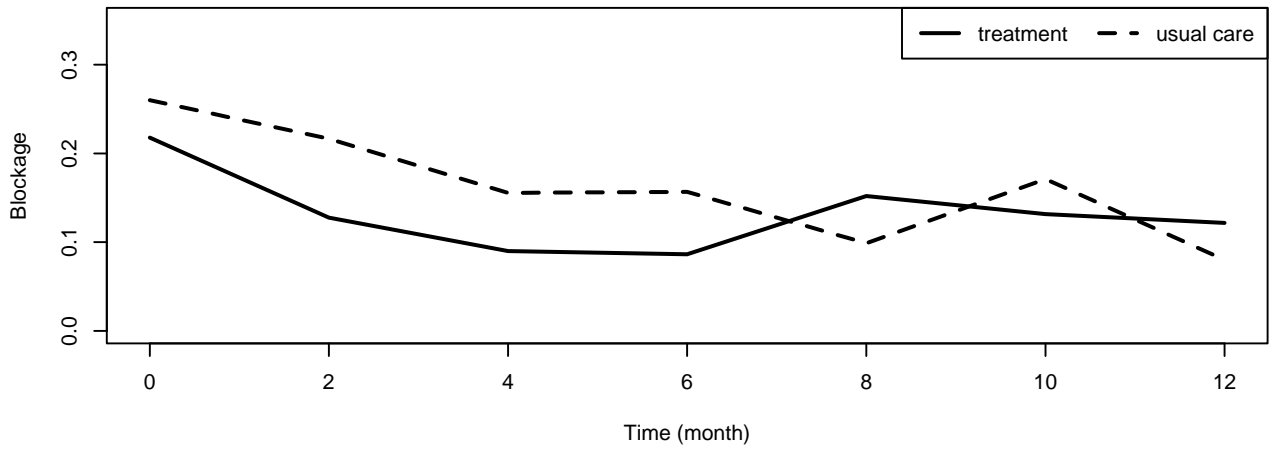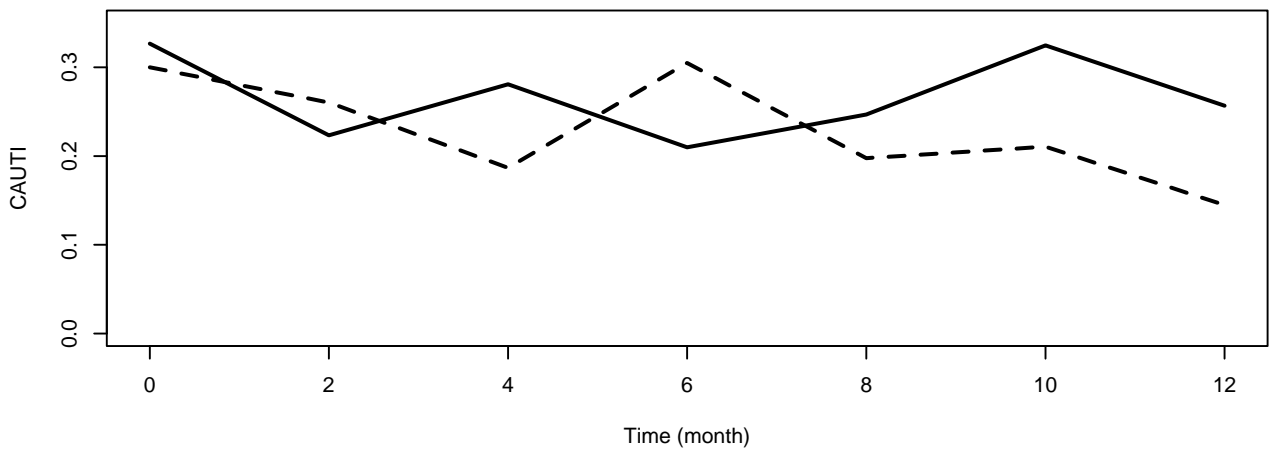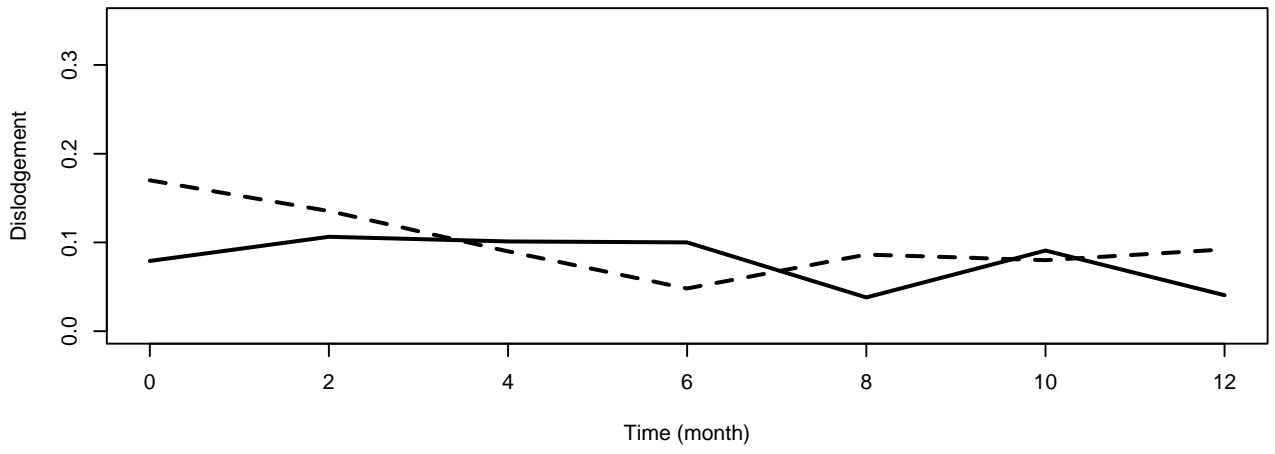

Supplement: NIHMS634269-supplement-Supplemental_Data_File__doc__pdf__etc__.pdf [file NIHMS634269-supplement-Supplemental_Data_File__doc__pdf__etc__.pdf]
